1 Determining the pathogenicity of variants of uncertain significance and identification of a  
2 founder variant in the epilepsy-associated gene, *SZT2*.

3  
4 Jeffrey D Calhoun,<sup>1</sup> Miriam C Aziz,<sup>1</sup> Hannah C Happ,<sup>1</sup> Jonathan Gunti,<sup>1</sup> Colleen Gleason,<sup>1</sup> Najma  
5 Mohamed,<sup>1</sup> Kristy Zeng,<sup>1</sup> Meredith Hiller,<sup>1</sup> Emily Bryant,<sup>2</sup> Divakar Mithal,<sup>2</sup> Irena Bellinski,<sup>1</sup> Lisa  
6 Kinsley,<sup>1</sup> Mona Grimmel,<sup>12</sup> Eva MC Schwaibold,<sup>4</sup> Constance Smith-Hicks,<sup>6,13</sup> Anna Chassevent,<sup>6</sup>  
7 Marcello Scala,<sup>7,15</sup> Andrea Accogli,<sup>15</sup> Annalaura Torella,<sup>16</sup> Pasquale Striano,<sup>7,15</sup> Valeria Capra,<sup>7,15</sup>  
8 Lynne M. Bird,<sup>8</sup> Issam Ben-Sahra,<sup>9</sup> Nina Ekhilevich,<sup>5</sup> Tova Hershkovitz,<sup>5,14</sup> Karin Weiss,<sup>5,14</sup> John  
9 Millichap,<sup>1,2</sup> Elizabeth E Gerard,<sup>1</sup> Gemma L Carvill<sup>1,10,11</sup>

10

11 <sup>1</sup>Ken and Ruth Davee Department of Neurology, Northwestern Feinberg School of Medicine,  
12 Chicago, Illinois

13 <sup>2</sup>Epilepsy Center and Division of Neurology, Ann & Robert H. Lurie Children's Hospital of  
14 Chicago

15 <sup>4</sup>Institute of Human Genetics, Heidelberg University, Heidelberg, Germany

16 <sup>5</sup>Genetics Institute, Rambam Medical Center

17 <sup>6</sup>Department of Neurogenetics, Kennedy Krieger Institute, Baltimore, Maryland

18 <sup>7</sup>Giannina Gaslini Children's Hospital

19 <sup>8</sup>University of California San Diego, Department of Pediatrics; Rady Children's Hospital San  
20 Diego, Division of Dysmorphology/Genetics

21 <sup>9</sup>Department of Biochemistry and Molecular Genetics, Northwestern Feinberg School of  
22 Medicine, Chicago, Illinois

23 <sup>10</sup>Department of Pharmacology, Northwestern Feinberg School of Medicine, Chicago, Illinois

24 <sup>11</sup>Department of Pediatrics, Northwestern Feinberg School of Medicine, Chicago, Illinois

25 <sup>12</sup>Institute of Medical Genetics and Applied Genomics, University of Tübingen, Tübingen,  
26 Germany

27 <sup>13</sup>Department of Neurology, Johns Hopkins University School of Medicine, Baltimore, MD

28 <sup>14</sup>Ruth and Bruce Rappaport Faculty of Medicine, Technion-Israel Institute of Technology, Haifa,  
29 Israel

30 <sup>15</sup>Department of Neurosciences, Rehabilitation, Ophthalmology, Genetics, Maternal and Child  
31 Health, University of Genova, Genova, Italy

32 <sup>16</sup>Telethon Institute of Genetics and Medicine (TIGEM), Pozzuoli, Italy

33

34 Correspondence

35

36 Gemma L. Carvill, [gemma.carvill@northwestern.edu](mailto:gemma.carvill@northwestern.edu)

37

38 Abstract: 192 words

39 Main text: 3620 words

40 Display items: 3 figures and 2 table

41 Supplementary data consists of 7 figures, 5 tables and supplementary methods

42

43

44 Abstract

45

46 Biallelic pathogenic variants in *SZT2* result in a neurodevelopmental disorder with  
47 shared features, including early-onset epilepsy, developmental delay, macrocephaly, and  
48 corpus callosum abnormalities. *SZT2* is as a critical scaffolding protein in the amino acid sensing  
49 arm of the mTOR signaling pathway. Due to its large size (3432 amino acids), lack of crystal  
50 structure, and absence of functional domains, it is difficult to determine the pathogenicity of  
51 *SZT2* missense and in-frame deletions. We report a cohort of twelve individuals with biallelic  
52 *SZT2* variants and phenotypes consistent with *SZT2*-related neurodevelopmental disorder. The  
53 majority of this cohort contained one or more *SZT2* variants of uncertain significance (VUS). We  
54 developed a novel individualized platform to functionally characterize *SZT2* VUSs. We identified  
55 a recurrent in-frame deletion (*SZT2* p.Val1984del) which was determined to be a loss-of-  
56 function variant and therefore likely pathogenic. Haplotype analysis determined this single in-  
57 frame deletion is a founder variant in those of Ashkenazi Jewish ancestry. Overall, we present a  
58 FACS-based rapid assay to distinguish pathogenic variants from VUSs in *SZT2*, using an approach  
59 that is widely applicable to other mTORopathies including the most common causes of the focal  
60 genetic epilepsies, *DEPDC5*, *TSC1/2*, *MTOR* and *NPRL2/3*.

61

## 62 Introduction

63

64 *SZT2* (*Seizure Threshold 2*) encodes a large (>350 kDa) protein with ubiquitous tissue  
65 expression and no homology to known functional domains<sup>1</sup>. The first association of *SZT2* with  
66 seizure susceptibility emerged from a mutagenesis screen in mice<sup>1</sup>. In this study, homozygous  
67 *Szt2* knockout mutant mice seized at a lower electrical input relative to wildtype littermates in  
68 an acute electroconvulsive model<sup>1</sup>. Years later, biallelic *SZT2* pathogenic variants were  
69 identified in a small cohort of patients with infantile-onset epilepsy and dysgenesis of the  
70 corpus callosum<sup>2</sup>. Since then, several small case studies report biallelic *SZT2* variants in  
71 association with a neurodevelopmental disorder (NDD) characterized primarily by early-onset  
72 focal epilepsy, developmental delays, macrocephaly and corpus callosum abnormalities<sup>2-16</sup>.

73 For years the function of *SZT2* remained elusive until 2017 when *SZT2* was identified as  
74 a part of the KICSTOR complex, a required component of the amino acid sensing arm of the  
75 mTORC1 pathway<sup>17; 18</sup>. The KICSTOR complex, including *SZT2*, localizes to the lysosomes only in  
76 the presence of amino acids in the extracellular environment<sup>17</sup>. In genome-edited cells lacking  
77 endogenous expression of *SZT2*, mTORC1 activity no longer depended on amino acids, i.e.  
78 mTORC1 was constitutively active<sup>17</sup>. Moreover, cells lacking *SZT2* exhibited amino acid-  
79 insensitive localization of mTOR to the lysosomal surface, suggesting that *SZT2* is a key  
80 scaffolding protein<sup>17</sup>. Based on these two pivotal studies, we hypothesize that biallelic *SZT2*  
81 loss-of-function (LoF) variants produce a mTORopathy due to constitutive mTORC1 activity<sup>17; 18</sup>.

82 The majority of the pathogenic *SZT2* variants described to date are truncations, resulting  
83 in complete *SZT2* LoF (null). However, there are now also many cases of both missense variants

84 and in-frame deletions that are more difficult to classify, driven primarily by our inability to  
85 determine the effect of single amino acid alterations on *SZT2* function. We focus primarily on  
86 these variants of uncertain significance (VUS) and devise a functional assay to identify LoF *SZT2*  
87 alleles. Moreover, we use this approach to demonstrate that a recurrent single amino acid  
88 deletion is both likely pathogenic and a founder variant in those of Jewish ancestry.

89

## 90 **Subjects and Methods**

### 91 *Study participants*

92 Individuals with candidate causative *SZT2* variants were identified by clinical exome  
93 sequencing (n=11) or gene panel (n=1). The individuals at Northwestern Memorial Hospital and  
94 Lurie Children's Hospital were consented to research under an IRB approved study. We  
95 obtained de-identified genetic and clinical data from external colleagues for cases identified  
96 through Genematcher<sup>19</sup>. These individuals were consented for research under IRB approved  
97 studies at their local institutions. *SZT2* variant classification was performed according to the  
98 American College of Medical Genetics (ACMG) criteria<sup>20</sup>.

99

### 100 *Haplotype analysis in individuals with the recurrent p.Val1984del variant*

101 Exome sequencing data from probands and parents with the *SZT2* p.Val1984del variant  
102 were obtained. Variant call files (vcfs) were generated with standard GATK best practices.  
103 Briefly, sequencing reads were aligned to the human genome (hg38) with BWA-MEM followed  
104 by calling and genotyping alleles with GATK HaplotypeCaller and GATK GenotypeGVCFs. Then,  
105 GATK SelectVariants was used to subset a vcf file containing variants within 20 Mb of *SZT2*

106 p.Val1984del in the individual homozygous due to uniparental disomy (UPD) of all of  
107 chromosome 1 (proband 3). SNVs and indels in this region were filtered by minor allele  
108 frequencies in gnomAD (see Web Resources) to generate a list of candidate variants for  
109 haplotype analysis. Segregation of alleles in independent trios was used to define haplotype  
110 boundaries.

111

### 112 *Generation of gene-edited cell lines*

113 pSpCas9(BB)-2A-Puro (PX459) V2.0 was a gift from Feng Zhang (Addgene plasmid #  
114 62988; <http://n2t.net/addgene:62988> ; RRID:Addgene\_62988). gRNAs targeting *SZT2* exons  
115 (Table S1) were cloned into PX459 as previously described <sup>21</sup>. HEK 293T (ATCC® CRL-3216™)  
116 cells were seeded into 24-well plates and transfected with pX459 plasmid with cloned gRNAs  
117 (500-1000 ng) and ssODN repair oligo (1-2 uL of 10 μM stock) with lipofectamine 3000  
118 (Invitrogen# L3000001) according to manufacturer's instructions. Cells were treated with  
119 puromycin (2.5 μg/mL) for 48 hours beginning the day after transfection. Cells were replica  
120 plated for cryopreservation and genomic DNA isolation with PureLink™ Genomic DNA Mini Kit  
121 (Invitrogen K182002) according to manufacturer's instructions. gRNA targeting of *SZT2* exon  
122 was confirmed by T7 endonuclease I (NEB# M0302) according to manufacturer's instructions.  
123 Homology-directed repair was confirmed by amplicon sequencing. Individual clones were  
124 collected by limited dilution cloning in 96 well plates followed by similar replica plating as  
125 described above. Genomic DNA from each clone was screened by Sanger sequencing as well as  
126 amplicon sequencing to confirm genotype as either (1) homozygous for the homology-directed

127 repair (HDR) allele or (2) compound heterozygous for the HDR allele and an out-of-frame indel  
128 predicted to lead to SZT2 LoF. All primer sequences provided in Table S1.

129

### 130 *Amplicon sequencing*

131 Amplicons with Illumina adaptors were generated by two rounds of PCR including the  
132 introduction of unique barcodes and standard Illumina primers. Amplicons were sequenced to a  
133 depth of at least 1,000X on an Illumina Miniseq according to manufacturer's recommendation.  
134 Alleles were analyzed with CRISPResso2 using the web interface or command line workflow<sup>22</sup>.

135

### 136 *Immunoblot analysis of mTORC1 activity*

137 Amino acid starvation was performed as previously described<sup>17</sup>. Briefly, cells plated in  
138 poly-L-lysine coated plates were rinsed in Dulbecco's phosphate-buffered saline (DPBS) (Gibco#  
139 14190250) twice before the addition of amino acid-free Dulbecco's minimal essential media  
140 (DMEM) containing 10% dialyzed FBS. For the amino acid starved condition, cells were starved  
141 of amino acids for 60 min at 37 °C. For cells treated with amino acids, cells were starved of  
142 amino acids for 50 min at 37 °C followed by incubation with amino acid containing DMEM for  
143 10 min at 37 °C. Cells were briefly rinsed with ice-cold DPBS twice. Cells were scraped in ice-  
144 cold DPBS and pelleted at 300 xg for 5 min. The cells were lysed in RIPA Lysis and Extraction  
145 Buffer (Thermo Scientific 89900) supplemented with EDTA-free protease inhibitors (Roche  
146 Complete PI EDTA-free; Sigma 11836170001) and PhosSTOP™ phosphatase inhibitors (Sigma  
147 4906845001) for 30 min at 4 °C. Insoluble material was removed by pelleting at 12,000 xg for  
148 20 min. Protein concentration was determined by BCA assay (Pierce™ BCA Protein Assay Kit;

149 Cat# 23225) and equal amounts (10-50  $\mu$ g) of protein were loaded for SDS-PAGE (4-12%  
150 gradient gel). Proteins were transferred to PVDF membrane and blocked for 60 min at room  
151 temperature (RT) with 5% bovine serum albumin (BSA) in PBS-T (PBS + 0.05% Tween20).  
152 Primary antibodies (Table S2) were incubated overnight at 4 °C in blocking buffer. Membranes  
153 were washed 3x 5 min in PBS-T prior to incubation with secondary antibodies (Table S2) for 60  
154 min at RT. After washing 4x 5 min in PBS-T, membranes were incubated in Amersham ECL Prime  
155 (GE Healthcare) according to manufacturer's instructions. Membranes were imaged on a Licor  
156 Odyssey Fc for 30 sec to 60 min.

157

#### 158 *FACS analysis of mTORC1 activity*

159 Amino acid starvation was performed as described above. After starvation, cells were  
160 washed twice with DPBS supplemented with 1% v/v Phosphatase Inhibitor Cocktail 3 (Sigma;  
161 P0044). Cell were trypsinized using tryPLE (Gibco) supplemented with 1% v/v Phosphatase  
162 Inhibitor Cocktail 3. Cells were pelleted (300 x g for 5 min at RT) and resuspended in BD  
163 Fixation/Permeabilization solution (BD Biosciences 554714). After incubation on ice for 20 min,  
164 cells were pelleted and washed twice with BD Permeabilization/Wash buffer. Phosphorylated  
165 S6 (p-S6) was labeled with Alexa488 conjugated antibody (Table S2) for 30 min on ice followed  
166 by two washes with BD Permeabilization/Wash buffer. Cells were flow sorted on the BD  
167 FACSMelody 3-laser cell sorter. At least 200,000 cells were collected for cells with dim  
168 Alexa488-signal (P-S6<sup>LOW</sup>) and those with bright Alexa488-signal (P-S6<sup>HIGH</sup>). Genomic DNA was  
169 prepared by manufacturer's recommendation using PureLink™ Genomic DNA Mini Kit  
170 (Invitrogen K182002) with slight modification to include a 40 min incubation at 90 °C to reverse

171 crosslinks. Amplicon sequencing and Sanger sequencing were performed on unsorted and  
172 sorted cells to determine the constitutive mTORC1 activity score (CMAS). CMAS is calculated for  
173 each allele present in the amplicon sequencing dataset.  $CMAS = \% \text{ alleles in P-S6}^{\text{HIGH}} / \% \text{ alleles}$   
174 in unsorted cells. CMAS represents an enrichment score to determine whether cells with high  
175 mTORC1 activity are enriched for proband-derived *SZT2* missense alleles (HDR-mediated). Allele  
176 percentage derived from amplicon sequencing and used to calculate CMAS are reported in  
177 Table S3.

178

## 179 **Results**

### 180 *Genetic characterization of individuals with bi-allelic SZT2 variants*

181 We describe 12 individuals with bi-allelic *SZT2* variants and of these 24 alleles,  
182 truncating variants were identified in a quarter (6/24) of the cohort (Figure S1; Table 1). This  
183 included one individual (Individual 2) who had bi-allelic *SZT2* truncating variants<sup>4</sup>, and five  
184 individuals carrying a truncating variant on one allele and a single amino acid change on the  
185 other (Individuals 1, 5, 6, 7, 8). Most individuals carried at least one *SZT2* VUS, and these  
186 variants accounted for the majority of the variants present in the cohort (missense: 12/24, 50%;  
187 in-frame del: 5/24, 21%). One variant (p.Val1984del) was identified in multiple individuals in our  
188 cohort and has been previously reported in a single individual<sup>11</sup>.

189

### 190 *Effect of patient-specific SZT2 variants on mTORC1 activity*

191 We designed a functional assay to measure the effect of these *SZT2* VUSs. We utilized  
192 CRISPR/Cas9 to edit HEK293T cells at the endogenous *SZT2* locus and then quantified mTORC1



193 signaling in cells starved or starved and subsequently treated with amino acids (Figure 1A).  
194 Notably HEK293T are diploid for chromosome 1 on which *SZT2* is located. First, we created a  
195 HEK293T *SZT2* null cell line (*SZT2*<sup>KO/KO</sup>) and recapitulated the constitutive mTORC1 activity and  
196 insensitivity to the presence of amino acids previously observed in *SZT2* null cell lines<sup>17; 18</sup>  
197 (Figure S2).

198 We examined one previously published likely pathogenic *SZT2* variant (c.1496G>T) and  
199 the recurrent p.Val1984del VUS identified in three patients in our cohort (Probands 1,3,4) along  
200 with one individual described previously<sup>2; 11</sup>. c.1496G is the last nucleotide of exon 10 and  
201 c.1496G>T yields two possible transcripts: (1) exon skipping resulting in *SZT2* p.Gly412Alafs\*86  
202 or (2) missense variant *SZT2* p.Ser499Ile. RT-PCR from patient fibroblasts suggested exon 10  
203 skipping, though it was unclear whether any of the predicted missense allele p.Ser499Ile  
204 transcript was generated, and if so, whether this missense VUS impacted *SZT2* function<sup>2</sup>. We  
205 generated a compound heterozygous *SZT2* cell line (HEK.*SZT2*<sup>c.1496G>T/KO</sup>) and by analysis of RNA  
206 transcripts determined that exon 10 is skipped, producing a truncated protein  
207 (p.Gly412Alafs\*86) (Figure S3). Furthermore, HEK.*SZT2*<sup>c.1496G>T/KO</sup> cells displayed constitutive  
208 mTORC1 activity (Figure 1C and Figure S4). We generated homozygous *SZT2* p.Val1984del HEK  
209 cells (HEK.*SZT2*<sup>p.Val1984del / p.Val1984del</sup>) and determined that this VUS also resulted in constitutively  
210 active mTORC1 (Figure 1B-C). Collectively, these results demonstrate that complete *SZT2* LoF  
211 and both the previously published c.1496G>T and the recurrent p.Val1984del lead to  
212 constitutive mTORC1 signaling also suggesting *SZT2* LoF.

213

214

215 *A medium-throughput assay for functional characterization of SZT2 VUS*

216           The time-consuming process of limited dilution cloning and identification of clones with  
217 desired genotypes led us to investigate methods to increase throughput of our approach. Based  
218 on high rates of indel formation (60+%) due to nonhomologous end-joining (NHEJ) as well as  
219 high HDR efficiency (up to 30%) in HEK293T, we considered the possibility of performing  
220 functional testing directly after gene editing. Though immunoblot analysis from a pool of cells  
221 with different *SZT2* alleles would be challenging to interpret, we hypothesized that  
222 immunolabeling for phospho-S6 (P-S6) followed by flow cytometry would be a viable  
223 alternative. Amino acid starved *SZT2* null cells were shown to have both elevated P-S6K and P-  
224 S6 levels due to constitutive mTORC1 activity<sup>18</sup>. The conceptual framework is as follows: if a  
225 variant is LoF variant, then cells homozygous for that variant or compound heterozygous for the  
226 variant and a truncating variant induced by NHEJ would lack any functional *SZT2* and therefore  
227 exhibit constitutive mTORC1 activation. Alternatively, if a variant did not cause *SZT2* LoF, cells  
228 with one or two copies would express sufficient levels of functional *SZT2* for physiological  
229 regulation of mTORC1 by amino acid deprivation (Figure 2A). Visually, a single right-shifted peak  
230 (P-S6<sup>HIGH</sup>) would be indicative of a LoF variant, while observation of two peaks (i.e. P-S6<sup>HIGH</sup> and  
231 P-S6<sup>LOW</sup>) would indicate the variant did not cause LoF. Subsequent genotyping of unsorted cells  
232 as well as the sorted pools of high and low phosphorylated-S6 (i.e. P-S6<sup>HIGH</sup> and P-S6<sup>LOW</sup>)  
233 allowed us to determine the CMAS for each allele.

234           As a proof-of-principle, we first performed phospho-S6 FACS sorting on amino acid  
235 starved wildtype HEK and HEK *SZT2*<sup>KO/KO</sup> cells. Wildtype HEK cells exhibited a single left-shifted  
236 peak (P-S6<sup>LOW</sup>), while the *SZT2*<sup>KO/KO</sup> cells exhibited a single right-shifted peak (P-S6<sup>HIGH</sup>),

237 indicating constitutive mTORC1 activity (Figure S5). We then used the assay to investigate a  
238 number of the *SZT2* VUSs present in the cohort: p.Val1984del, p.Glu1447Ala, p.Arg1948Gln, and  
239 p.Arg2589Trp (Figure 2B). As an additional negative control, we assayed a common variant in  
240 the general population, *SZT2* p.Pro446Ser (MAF=0.3 in gnomAD), and present in a homozygous  
241 state in multiple individuals (n=15,475). All LoF alleles had high CMAS scores (mean CMAS=1.41  
242  $\pm$  0.2; n=13) consistent with constitutively active mTORC1, while CMAS for *SZT2* p.Pro446Ser  
243 was low (0.26  $\pm$  0.07; n=2), consistent with the protein retaining physiological scaffolding  
244 function and amino acid sensitive mTORC1 (Figure 2C and S6). As with the western blot analysis  
245 above, p.Val1984del was significantly enriched in the P-S6<sup>HIGH</sup> (mean CMAS = 0.91  $\pm$  0.06; n=3)  
246 pool, indicative of constitutive mTORC1 activity. Conversely, p.Glu1447Ala (mean CMAS = 0.38  
247  $\pm$  0.08), p.Arg1948Gln (mean CMAS = 0.17  $\pm$  0.03; n=2), and p.Arg2589Trp (mean CMAS = 0.48  $\pm$   
248 0.15) were not enriched in the P-S6<sup>HIGH</sup> pool, (Figure 2 B-C) and CMAS were not significantly  
249 different to p.Pro446Ser, but rather were consistent with the CMAS of the benign variant,  
250 suggesting these variants do not cause *SZT2* LoF.

251

#### 252 *Haplotype analysis of recurrent SZT2 in-frame deletion p.Val1984del*

253 Based on our observation of p.Val1984del in multiple individuals, we hypothesized this  
254 variant may be derived from a common ancestor. In support of this observation, *SZT2*  
255 p.Val1984del is observed at low allele frequency in two populations in gnomAD, specifically in  
256 non-Finnish Europeans (MAF=0.00005420) and Ashkenazi Jewish (MAF=0.0008679), though no  
257 homozygous individuals are reported. Using exome sequencing data we identified a shared

258 haplotype spanning ~4 Mb including the *SZT2* p.Val1984del in all three individuals in our cohort  
259 (Figure 3), suggesting this variant is a founder variant in those of Jewish ancestry.

260

### 261 *Clinical characterization of individuals with bi-allelic SZT2 variants*

262 The functional assays allowed us to tentatively reclassify 8/16 (50%) VUS in our cohort  
263 of 12 individuals. We acknowledge that reclassification of variants based on functional data is  
264 relevant in a clinical setting when classification is based on a ‘well-established assay’, which our  
265 approach has not yet achieved <sup>20</sup>. However, for simplicity sake in this research study we  
266 reclassified VUS with CMAS similar to p.Pro446Ser (GnomAD MAF=0.3, numerous  
267 homozygotes) as likely benign (LB) and VUS with CMAS consistent with *SZT2* LoF as likely  
268 pathogenic (LP). We then grouped these individuals into four groups (P or LP/P or LP, P or  
269 LP/VUS, VUS/VUS, LB/LB) and assessed the prevalence of the most common clinical features  
270 associated with pathogenic *SZT2* variants i.e. early-onset epilepsy, developmental delays,  
271 intractable focal seizures, macrocephaly and corpus callosum abnormalities (Table 1 and 2) <sup>2-16</sup>.  
272 Individual 2 with bi-allelic *SZT2* truncating variants did not require reclassification but was  
273 included in the cohort as a representative of the P/P group for the purpose of phenotypic  
274 comparison. While sub-grouping the cohort in this manner meant we were unable to perform  
275 statistical analysis due to small group sizes, we could make a number of observations. The  
276 median seizure onset was 24 months and relatively consistent, with the exception of the LB/LB  
277 group where seizure onset was much later (median 13 years) and a number of the core features  
278 of *SZT2*-associated epilepsy were present in only one of the two individuals with these variants.  
279 Conversely, most individuals with either PLP/PLP or PLP/VUS did present with focal seizures,

280 developmental delay and macrocephaly. Notably, where this information was available, the  
281 majority of individuals achieved seizure control, most with anti-seizure medications, but some  
282 were self-limiting (Table S4). Moreover, very few individuals, except individuals 9 and 11, had  
283 corpus callosum abnormalities (Table S5 and Figure S6).

284

## 285 **Discussion**

286       The identification of VUS is one of the most challenging bottlenecks in clinical genetic  
287 diagnostics of the modern era. We developed a novel individualized platform that allowed us to  
288 recategorize 8/16 (50%) of *SZT2* VUS. Of note, we identify a recurrent in-frame deletion  
289 (p.Val1984del) in four individuals, including two in a homozygous state (one instance of  
290 chromosome 1 UPD), and one heterozygous *in trans* with a truncating variant. Two of the  
291 individuals (1 and 3) were identified at Lurie Children's hospital over two years. We determined  
292 that this variant is a founder variant in individuals with Jewish ancestry. A carrier frequency of  
293 1:576 is estimated based on gnomAD data, but may differ on local ancestry, and inclusion of  
294 this variant in genetic testing panels for those with Jewish ancestry requires further  
295 investigation.

296       Based on the necessity for a functional assay to reclassify *SZT2* VUSs, we developed a  
297 strategy to functionally characterize *SZT2* VUSs by knock-in of *SZT2* variants into HEK 293T cells.  
298 The molecular function of *SZT2* as a critical regulatory scaffolding protein in the amino acid  
299 sensing arm of the mTOR signaling pathway had previously been elucidated in HEK 293T<sup>17; 18</sup>.  
300 Advantages of using HEK 293T cells are the high transfection and gene editing efficiencies, both  
301 for knockout (NHEJ) and knock-in (HDR) strategies. We successfully developed this strategy as a

302 medium-throughput assay that revealed a recurrent inframe deletion *SZT2* p.Val1984del to be a  
303 LoF variant (Figure 2B-C and Figure 3B-C). Using this FACS-based assay we also functionally  
304 characterized an additional set of 3 *SZT2* VUSs (p.Glu1447Ala, p.Arg1948Gln, and p.Arg2589Trp)  
305 as unlikely to be LoF as these variants retained amino-acid sensitive mTORC1 activity as  
306 observed for a common population variant (p.Pro446Ser) and suggest these variants are likely  
307 benign. However, while our approach can robustly detect complete LoF alleles, it may not  
308 detect more subtle effects on protein function, including partial LoF. Moreover, we know that  
309 the clinical features of individuals with pathogenic *SZT2* variants are neuronally restricted, even  
310 though *SZT2* is ubiquitously expressed, thus perturbation of the mTOR pathway is more likely to  
311 have a detrimental impact during neuronal development and/or function. For instance, it has  
312 recently been shown that mTOR regulation is essential for outer radial glia migration during  
313 human neuronal development<sup>23</sup>. In the future, development of high-throughput functional  
314 assays in cells of a neuronal lineage, for instance, immortalized ReNcells, may improve on the  
315 discriminatory power of the novel assay we present here.

316 Nakamura Y et al. recently examined mTORC1 activity in lymphoblastoid cell lines (LCLs)  
317 from affected individuals<sup>24</sup>. They report elevated mTORC1 activity in cell lines derived from  
318 individuals with biallelic *SZT2* variants relative to cell lines generated from healthy individuals.  
319 There are a few important caveats to their study. First, the developed assay requires generating  
320 LCLs from individuals, which is not always possible and decreases throughput. Further, both cell  
321 lines generated from individuals with biallelic *SZT2* LoF variants show significant response to  
322 amino acid treatment after starvation. One of the key findings from the initial studies, and our  
323 studies here in HEK293T cells, was that *SZT2* gene knockout rendered cells completely

324 insensitive to amino acids<sup>17;18</sup>. Although difficult to explain, the finding could be a technical  
325 issue with the LCL model.

326         Similar to previously published biallelic *SZT2* cases, most individuals carrying either P/LP  
327 or VUS presented with pediatric-onset epilepsy and expressed common features including focal  
328 seizures, developmental delay and macrocephaly. However, none of the individuals in these  
329 groups had corpus callosum abnormalities, including those with P/LP variants, suggesting that  
330 this is not a cardinal feature of *SZT2*-associated epilepsy. Moreover, a genotype-phenotype  
331 correlation has been suggested; individuals bearing truncating mutations may be more likely to  
332 have intractable seizures than individuals with missense variants<sup>12</sup>. In this cohort, we observed  
333 more variability, with individual 2 (bi-allelic truncations) having seizure onset at two months  
334 with intractable seizures, while the other individual with intractable seizures (with seizure onset  
335 at two days of life) carried a multi-exon in-frame deletion and a VUS (Table S4, S5). Moreover,  
336 the individuals with homozygous p.Val1984del (individuals 3, 4) had divergent presentations,  
337 with individual 3 presenting with DEE and intractable seizures while individual 4 had a  
338 suspected neonatal seizures that resolved without medication. Despite these differing seizure  
339 patterns, both individuals have developmental delays and cognitive impairment. Finally, one  
340 individual had adult-onset epilepsy with seizures eventually being well-controlled on anti-  
341 convulsant medication. This individual had dysgenesis of the corpus callosum (Figure S6) and  
342 was found to have inherited *SZT2* missense VUS from each parent. This case is rather intriguing,  
343 as it potentially suggests the phenotypic spectrum for biallelic *SZT2* variants is significantly  
344 broader than previously thought. However, testing of these variants utilizing our assay suggests  
345 they do not cause *SZT2* LoF, although we cannot rule out the possibility of partial LoF variants,

346 as described above, which could account for the milder phenotypic presentation. Collectively,  
347 these results suggest a straightforward genotype-phenotype relationship is unlikely and further  
348 studies are needed to characterize the phenotypic spectrum and the impact of genetic variation  
349 on protein function.

350 In summary, here we demonstrate the utility of an individualized platform to  
351 recharacterize *SZT2* VUS. Importantly, this included a p.Val1984del variant that has a carrier  
352 allele frequency of at least 1:576 in those of Jewish ancestry and is a founder variant in this  
353 population. While additional modifications are still required to increase throughput, perhaps  
354 using saturation mutagenesis or multiplex assays of variant effect (MAVE)<sup>25; 26</sup>, our approach  
355 can be applied to characterize VUS in other mTORopathies, including *TSC1*, *TSC2*, *DEPDC5*,  
356 *NPRL2* and *NPRL3*, which are the most common causes of focal epilepsies. As the  
357 mTORopathies are the targets of multiple new clinical trials for mTORC inhibitors, resolution of  
358 VUSs could qualify more individuals with intractable epilepsies for inclusion in these studies<sup>27</sup>.

359

#### 360 **Supplemental Data**

361 Supplemental data includes seven figures and five tables.

362

#### 363 **Acknowledgments**

364

365 This work was sponsored by NIH NINDS ROONS089858 (GLC). We thank the NUCATS TL1 award  
366 for support (TR001423 to JDC). We thank Dr. Suchitra Swaminathan and Paul Mehl for  
367 assistance with flow cytometry. This work was supported by the Northwestern University –  
368 Flow Cytometry Core Facility supported by Cancer Center Support Grant (NCI CA060553). Flow



369 Cytometry Cell Sorting was performed on a BD FACSAria SORP system and BD FACSymphony S6  
370 SORP system, purchased through the support of NIH 1S10OD011996-01 and 1S10OD026814-01.

371

### 372 **Declaration of Interests**

373 Dr. Carvill holds a collaborative research grant with Stoke Therapeutics for research unrelated  
374 to this manuscript, all other authors have nothing to declare.

375

### 376 **Web Resources**

377

378 gnomAD v2.1.1 (<https://gnomad.broadinstitute.org>) - last accessed 23 Oct 2020

379

380 SeattleSeq (<https://snp.gs.washington.edu/SeattleSeqAnnotation138/>) – last accessed 22 Oct  
381 2020

382

383 Clinvar (<https://www.ncbi.nlm.nih.gov/clinvar/>) - last accessed 22 Oct 2020

384

385

386

387

388 **References**

- 389 1. Frankel, W.N., Yang, Y., Mahaffey, C.L., Beyer, B.J., and O'Brien, T.P. (2009). Szt2, a novel  
390 gene for seizure threshold in mice. *Genes Brain Behav* 8, 568-576.
- 391 2. Basel-Vanagaite, L., Hershkovitz, T., Heyman, E., Raspall-Chaure, M., Kakar, N., Smirin-Yosef,  
392 P., Vila-Pueyo, M., Kornreich, L., Thiele, H., Bode, H., et al. (2013). Biallelic SZT2  
393 mutations cause infantile encephalopathy with epilepsy and dysmorphic corpus  
394 callosum. *Am J Hum Genet* 93, 524-529.
- 395 3. Falcone, M., Yariz, K.O., Ross, D.B., Foster, J., 2nd, Menendez, I., and Tekin, M. (2013). An  
396 amino acid deletion in SZT2 in a family with non-syndromic intellectual disability. *PLoS*  
397 *One* 8, e82810.
- 398 4. Venkatesan, C., Angle, B., and Millichap, J.J. (2016). Early-life epileptic encephalopathy  
399 secondary to SZT2 pathogenic recessive variants. *Epileptic Disord* 18, 195-200.
- 400 5. Tsuchida, N., Nakashima, M., Miyauchi, A., Yoshitomi, S., Kimizu, T., Ganesan, V., Teik, K.W.,  
401 Ch'ng, G.S., Kato, M., Mizuguchi, T., et al. (2018). Novel biallelic SZT2 mutations in 3  
402 cases of early-onset epileptic encephalopathy. *Clin Genet* 93, 266-274.
- 403 6. Nakamura, Y., Togawa, Y., Okuno, Y., Muramatsu, H., Nakabayashi, K., Kuroki, Y., Ieda, D.,  
404 Hori, I., Negishi, Y., Togawa, T., et al. (2018). Biallelic mutations in SZT2 cause a  
405 discernible clinical entity with epilepsy, developmental delay, macrocephaly and a  
406 dysmorphic corpus callosum. *Brain Dev* 40, 134-139.
- 407 7. Pizzino, A., Whitehead, M., Sabet Rasekh, P., Murphy, J., Helman, G., Bloom, M., Evans, S.H.,  
408 Murnick, J.G., Conry, J., Taft, R.J., et al. (2018). Mutations in SZT2 result in early-onset  
409 epileptic encephalopathy and leukoencephalopathy. *Am J Med Genet A* 176, 1443-1448.

- 410 8. Naseer, M.I., Alwasiyah, M.K., Abdulkareem, A.A., Bajammal, R.A., Trujillo, C., Abu-Elmagd,  
411 M., Jafri, M.A., Chaudhary, A.G., and Al-Qahtani, M.H. (2018). A novel homozygous  
412 mutation in SZT2 gene in Saudi family with developmental delay, macrocephaly and  
413 epilepsy. *Genes Genomics* 40, 1149-1155.
- 414 9. Kariminejad, A., Yazdan, H., Rahimian, E., Kalhor, Z., Fattahi, Z., Zonooz, M.F., Najmabadi, H.,  
415 and Ashrafi, M. (2019). SZT2 mutation in a boy with intellectual disability, seizures and  
416 autistic features. *Eur J Med Genet* 62, 103556.
- 417 10. Imaizumi, T., Kumakura, A., Yamamoto-Shimajima, K., Ondo, Y., and Yamamoto, T. (2018).  
418 Identification of a rare homozygous SZT2 variant due to uniparental disomy in a patient  
419 with a neurodevelopmental disorder. *Intractable Rare Dis Res* 7, 245-250.
- 420 11. Uittenbogaard, M., Gropman, A., Brantner, C.A., and Chiaramello, A. (2018). Novel  
421 metabolic signatures of compound heterozygous Szt2 variants in a case of early-onset of  
422 epileptic encephalopathy. *Clin Case Rep* 6, 2376-2384.
- 423 12. Domingues, F.S., Konig, E., Schwienbacher, C., Volpato, C.B., Picard, A., Cantaloni, C.,  
424 Mascalzoni, D., Lackner, P., Heimbach, A., Hoffmann, P., et al. (2019). Compound  
425 heterozygous SZT2 mutations in two siblings with early-onset epilepsy, intellectual  
426 disability and macrocephaly. *Seizure* 66, 81-85.
- 427 13. Iodice, A., Spagnoli, C., Frattini, D., Salerno, G.G., Rizzi, S., and Fusco, C. (2019). Biallelic SZT2  
428 mutation with early onset of focal status epilepticus: Useful diagnostic clues other than  
429 epilepsy, intellectual disability and macrocephaly. *Seizure* 69, 296-297.
- 430 14. Sun, X., Zhong, X., and Li, T. (2019). Novel SZT2 mutations in three patients with  
431 developmental and epileptic encephalopathies. *Mol Genet Genomic Med* 7, e926.

- 432 15. Trivisano, M., Rivera, M., Terracciano, A., Ciolfi, A., Napolitano, A., Pepi, C., Calabrese, C.,  
433 Digilio, M.C., Tartaglia, M., Curatolo, P., et al. (2020). Developmental and epileptic  
434 encephalopathy due to SZT2 genomic variants: Emerging features of a syndromic  
435 condition. *Epilepsy Behav* 108, 107097.
- 436 16. Tanaka, R., Takahashi, S., Kuroda, M., Takeguchi, R., Suzuki, N., Makita, Y., Narumi-  
437 Kishimoto, Y., and Kaname, T. (2020). Biallelic SZT2 variants in a child with  
438 developmental and epileptic encephalopathy. *Epileptic Disord* 22, 501-505.
- 439 17. Wolfson, R.L., Chantranupong, L., Wyant, G.A., Gu, X., Orozco, J.M., Shen, K., Condon, K.J.,  
440 Petri, S., Kedir, J., Scaria, S.M., et al. (2017). KICSTOR recruits GATOR1 to the lysosome  
441 and is necessary for nutrients to regulate mTORC1. *Nature* 543, 438-442.
- 442 18. Peng, M., Yin, N., and Li, M.O. (2017). SZT2 dictates GATOR control of mTORC1 signalling.  
443 *Nature* 543, 433-437.
- 444 19. Sobreira, N., Schiettecatte, F., Valle, D., and Hamosh, A. (2015). GeneMatcher: a matching  
445 tool for connecting investigators with an interest in the same gene. *Hum Mutat* 36, 928-  
446 930.
- 447 20. Richards, S., Aziz, N., Bale, S., Bick, D., Das, S., Gastier-Foster, J., Grody, W.W., Hegde, M.,  
448 Lyon, E., Spector, E., et al. (2015). Standards and guidelines for the interpretation of  
449 sequence variants: a joint consensus recommendation of the American College of  
450 Medical Genetics and Genomics and the Association for Molecular Pathology. *Genet  
451 Med* 17, 405-424.
- 452 21. Ran, F.A., Hsu, P.D., Wright, J., Agarwala, V., Scott, D.A., and Zhang, F. (2013). Genome  
453 engineering using the CRISPR-Cas9 system. *Nat Protoc* 8, 2281-2308.

- 454 22. Clement, K., Rees, H., Canver, M.C., Gehrke, J.M., Farouni, R., Hsu, J.Y., Cole, M.A., Liu, D.R.,  
455 Joung, J.K., Bauer, D.E., et al. (2019). CRISPResso2 provides accurate and rapid genome  
456 editing sequence analysis. *Nat Biotechnol* 37, 224-226.
- 457 23. Andrews, M.G., Subramanian, L., and Kriegstein, A.R. (2020). mTOR signaling regulates the  
458 morphology and migration of outer radial glia in developing human cortex. *Elife* 9.
- 459 24. Nakamura, Y., Kato, K., Tsuchida, N., Matsumoto, N., Takahashi, Y., and Saitoh, S. (2019).  
460 Constitutive activation of mTORC1 signaling induced by biallelic loss-of-function  
461 mutations in *SZT2* underlies a discernible neurodevelopmental disease. *PLoS One* 14,  
462 e0221482.
- 463 25. Findlay, G.M., Boyle, E.A., Hause, R.J., Klein, J.C., and Shendure, J. (2014). Saturation editing  
464 of genomic regions by multiplex homology-directed repair. *Nature* 513, 120-123.
- 465 26. Starita, L.M., Ahituv, N., Dunham, M.J., Kitzman, J.O., Roth, F.P., Seelig, G., Shendure, J., and  
466 Fowler, D.M. (2017). Variant Interpretation: Functional Assays to the Rescue. *Am J Hum*  
467 *Genet* 101, 315-325.
- 468 27. Theilmann, W., Gericke, B., Schidlitzki, A., Muneeb Anjum, S.M., Borsdorf, S., Harries, T.,  
469 Roberds, S.L., Aguiar, D.J., Brunner, D., Leiser, S.C., et al. (2020). Novel brain permeant  
470 mTORC1/2 inhibitors are as efficacious as rapamycin or everolimus in mouse models of  
471 acquired partial epilepsy and tuberous sclerosis complex. *Neuropharmacology* 180,  
472 108297.
- 473
- 474
- 475

476 **Figure Legends**

477

478 **Figure 1 Development of gene editing approach for functional characterization of *SZT2* VUSs.**

479 (A) Individual cell clones either homozygous or heterozygous (+ LoF on other allele) for an  
480 individual *SZT2* variant were generated by gene editing followed by limiting dilution cloning.  
481 Immunoblot for amino acid sensitive mTORC1 activity by P-S6K levels was used to determine  
482 whether individual variants caused *SZT2* loss of function. Homology-directed repair rate of cells  
483 generated by transfection of px459 encoding targeting gRNAs was analyzed using amplicon  
484 sequencing and varied between 12-25%. (B) Immunoblot of mTORC1 activity in control HEK  
485 cells and homozygous HEK *SZT2*<sup>p.Val1984del/p.Val1984del</sup> clone. (C) Densitometric quantification of (B).  
486 At least 3 individual replicates were performed. \* =  $p < 0.05$  (T-test).

487

488 **Figure 2**

489 **Development of medium throughput assay for functional characterization of *SZT2* VUSs. (A)**

490 HEK cells were co-transfected with px459 encoding targeting gRNAs and repair  
491 oligonucleotides, followed by puromycin selection. Cells were starved of amino acids and then  
492 fixed for immunolabeling of phosphorylated S6 and FACS sorting. gDNA was isolated from  
493 unsorted and sorted cells followed by amplicon sequencing to confirm CRISPR/Cas9 targeting  
494 and to calculate CMAS. (B) Representative FACS plots. Dashed line represents the boundary for  
495 sorting P-S6<sup>HIGH</sup> and P-S6<sup>LOW</sup> cell populations. (C) CMAS scores derived from amplicon  
496 sequencing of sorted and unsorted cells. For all but p.Arg1948Gln (n=2) and p.Pro466Ser (n=2),

497 at least 3 individual replicates were performed. \* =  $p < 0.05$  (One-way ANOVA with Tukey's  
498 posthoc test).

499

500 **Figure 3**

501 **Shared haplotype suggests *SZT2* p.Val1984del is a founder variant in those of Ashkenazi**

502 **Jewish ancestry.** Using exome sequencing data from three study trios in combination with

503 allelic frequencies in the gnomAD population database, all individuals carry the same rare (MAF

504 ranging from 0.00007-0.2) variants spanning a 4Mb interval. Ref|Alt alleles for SNVs (1 & 5

505 flanking; 2-4 in haplotype block): (1) rs12406524=G|A; (2) rs142849148=G|C; (3)

506 rs1126742=A|G; (4) rs13376679=T|C; (5) rs75538709=G|A.

507

508 **Table 1 Genetic details of biallelic *SZT2* variants**

| Individual                            | 1                                   | 2                                     | 3                                             | 4                               | 5                                                        | 6                           | 7                               | 8                                   | 9                      | 10                     | 11                     | 12                     |
|---------------------------------------|-------------------------------------|---------------------------------------|-----------------------------------------------|---------------------------------|----------------------------------------------------------|-----------------------------|---------------------------------|-------------------------------------|------------------------|------------------------|------------------------|------------------------|
| <b>Testing</b>                        | Exome                               | Exome                                 | Exome                                         | Exome                           | Exome                                                    | Exome                       | Exome                           | Panel                               | Exome                  | Exome                  | Exome                  | Exome                  |
| <b>Inheritance</b>                    | Cmp Het                             | Cmp Het                               | Hmz                                           | Hmz                             | Cmp Het                                                  | Cmp Het                     | Cmp Het                         | Cmp Het <sup>§</sup>                | Hmz                    | Cmp Het                | Cmp Het                | Hmz <sup>§</sup>       |
| <b>Maternally inherited allele</b>    |                                     |                                       |                                               |                                 |                                                          |                             |                                 |                                     |                        |                        |                        |                        |
| <b>Variant (NM 015284, NP_056099)</b> | c.9407_9408 dupTG p.Val3137Trpfs*48 | c.9703C>T p.Arg3235*                  | None <sup>%</sup> %UPD of all of chromosome 1 | c.5949_5951 delTGT p.Val1984del | c.2384_5680 del p.His795_His1893del (exon16-40 deletion) | c.841delC p.Gln281S erfs*32 | c.1173_1174del p.Lys393Glyfs*47 | c.1091-1G>A <sup>§</sup>            | c.7448C>T p.Ser2483Leu | c.7346G>A p.Arg2449Gln | c.5843G>A p.Arg1948Gln | c.7765C>T p.Arg2589Trp |
| <b>GnomAD MAF</b>                     | 4.16e-6                             | 5.63e-6                               | Unk                                           | 6.36e-5                         | Unk                                                      | 4.37e-6                     | NP                              | NP                                  | 7.95e-6                | 3.99e-5                | 7.96e-6                | 1.59e-5                |
| <b>CADD Polyphe n</b>                 | 50 N/A                              | 50 N/A                                | N/A N/A                                       | N/A N/A                         | 50 N/A                                                   | 50 N/A                      | 50 N/A                          | 50 N/A                              | 18.74 1                | 15.37 0.897            | 16.93 0.976            | 19.83 1                |
| <b>ACMG Classification</b>            | P                                   | P                                     | N/A                                           | VUS                             | P                                                        | P                           | P                               | P                                   | VUS                    | VUS                    | VUS                    | VUS                    |
| <b>Reclassified *</b>                 | P (NT)                              | P (NT)                                | N/A                                           | <b>LP</b>                       | P (NT)                                                   | P (NT)                      | P (NT)                          | P (NT)                              | VUS (NT)               | VUS                    | <b>LB</b>              | <b>LB</b>              |
| <b>Paternally inherited allele</b>    |                                     |                                       |                                               |                                 |                                                          |                             |                                 |                                     |                        |                        |                        |                        |
| <b>Variant</b>                        | c.5949_5951 delTGT p.Val1984del     | c.3509_3512 delCAGA p.Thr1170Argfs*22 | c.5949_5951 delTGT p.Val1984del               | c.5949_5951 delTGT p.Val1984del | c.1678G>T, p.Ala560Ser                                   | c.6553C>T p.Arg2185Trp      | c.4040G>A p.Arg1347His          | c.7588A>C p.Ile2530Leu <sup>§</sup> | c.7448C>T p.Ser2483Leu | c.3757C>T p.Arg1253Cys | c.4340A>C p.Glu1447Ala | c.7765C>T p.Arg2589Trp |
| <b>GnomAD MAF</b>                     | 6.36e-5                             | NP                                    | 6.36e-5                                       | 6.36e-5                         | NP                                                       | 2.39e-5                     | 1.13e-4                         | 6.36e-5                             | NP                     | 6.36e-5                | 6.36e-5                | NP                     |
| <b>CADD Polyphe n</b>                 | N/A N/A                             | 50 N/A                                | N/A N/A                                       | N/A N/A                         | 15.9 0.007                                               | 16.55 1                     | 16.7 0.004                      | 8.82 0                              | 18.74 1                | 16.72 1                | 17.62 1                | 19.83 1                |
| <b>ACMG Classification</b>            | VUS                                 | P                                     | VUS                                           | VUS                             | VUS                                                      | VUS                         | VUS                             | VUS                                 | VUS                    | VUS                    | VUS                    | VUS                    |
| <b>Reclassified *</b>                 | <b>LP</b>                           | P (NT)                                | <b>LP</b>                                     | <b>LP</b>                       | VUS (NT)                                                 | VUS (NT)                    | VUS (NT)                        | VUS (NT)                            | VUS (NT)               | VUS                    | <b>LB</b>              | <b>LB</b>              |

509 Footnotes: \*Variant reclassification after functional testing. Abbreviations used include Cmp het: compound heterozygous, Hmz: homozygous, P: Pathogenic, LP: Likely pathogenic, VUS: variant of uncertain significance, LB: likely benign, MAF: minor allele frequency, CADD: Combined Annotation Dependent Depletion, 510 ACMG: American College of Medical Genetics, NP, not present; VUS: variant of uncertain significance, LB: likely benign, NT: not tested, Unk: unknown, NP: not 511



512 present. <sup>%</sup>Uniparental disomy (UPD) of all of chromosome 1. <sup>&</sup>Regions of homozygosity detected suggesting consanguinity. <sup>§</sup>Samples from both parents were not  
 513 available to confirm inheritance, the maternally and paternally inherited variants are randomly assigned in the table for clarity only.

514

515

516 **Table 2 Summary of clinical features stratified by ACMG criteria and functional classification**

| Category                      | P or LP/<br>P or LP    | P or LP/VUS                | VUS/VUS        | LB/LB            | Cohort                |
|-------------------------------|------------------------|----------------------------|----------------|------------------|-----------------------|
| Affected individuals          | 1-4 (n=4)              | 5-8 (n=4)                  | 9,10 (n=2)     | 11,12 (n=2)      | <b>n=12</b>           |
| Median seizure onset (range)  | 30m (2m-4y)            | 9m (2DOL-2y)               | 18m (3DOL-3 y) | 13 y (6y10m-20y) | <b>24m (2DOL-20y)</b> |
| Focal seizure                 | 3/4 (75%)              | 2/4 <sup>&amp;</sup> (50%) | 0/2 (0%)       | 1/2 (50%)        | <b>6/12 (50%)</b>     |
| Seizures intractable          | 2/4 (50%)              | 1/3 (33%)                  | 0/2 (0%)       | 1/2* (50%)       | <b>4/11 (36%)</b>     |
| Developmental delays          | 4/4 (100%)             | 4/4 (100%)                 | 2/2 (100%)     | 1/2 (50%)        | <b>11/12 (92%)</b>    |
| Macrocephaly                  | 3/4 <sup>^</sup> (75%) | 2/4 <sup>%</sup> (50%)     | 1/2 (50%)      | 1/2 (50%)        | <b>7/12 (58%)</b>     |
| Corpus callosum abnormalities | 0/4 (0%)               | 1/4 (25%)                  | 1/2 (50%)      | 1/2 (50%)        | <b>3/12 (25%)</b>     |

517 <sup>^</sup> Individual 4 had microcephaly <sup>&</sup> individual 7 had no report of seizures and <sup>%</sup> microcephaly <sup>\*</sup>individual 12 achieved only partial seizure control  
 518 Abbreviations: DOL, day of life; m, months; y, years

519

**A**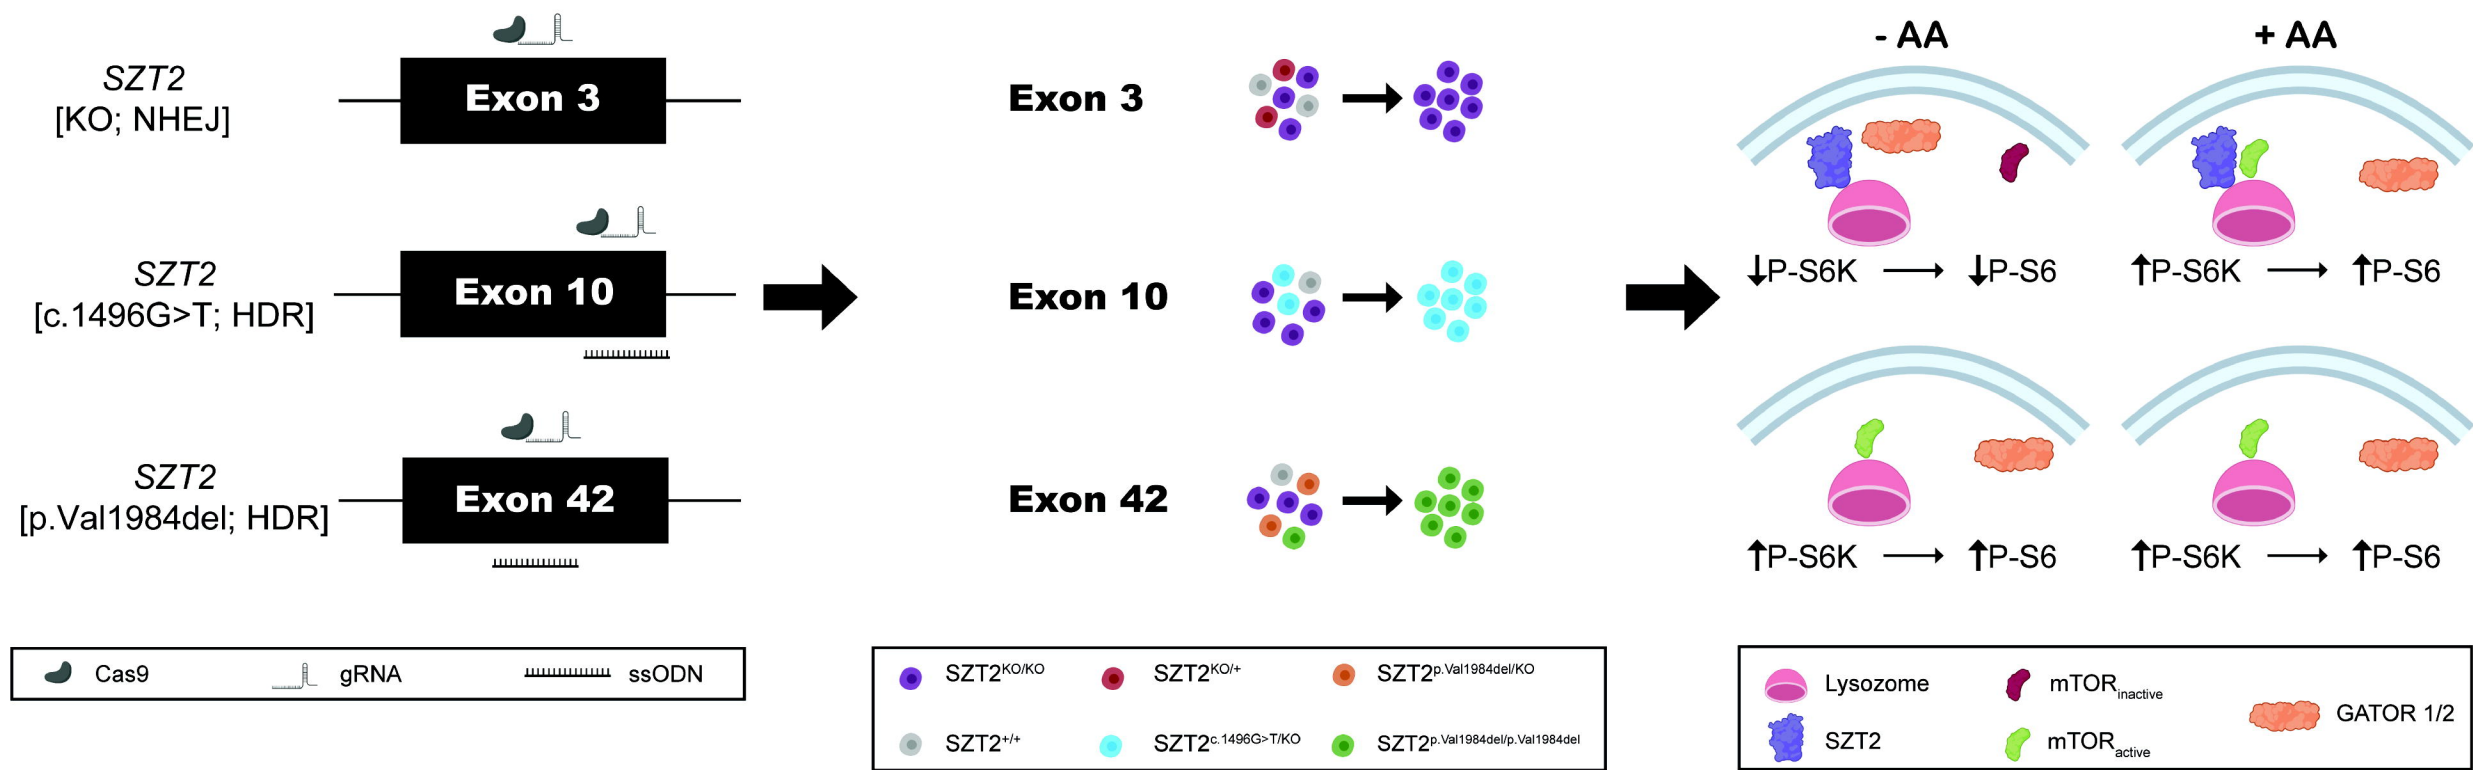**B**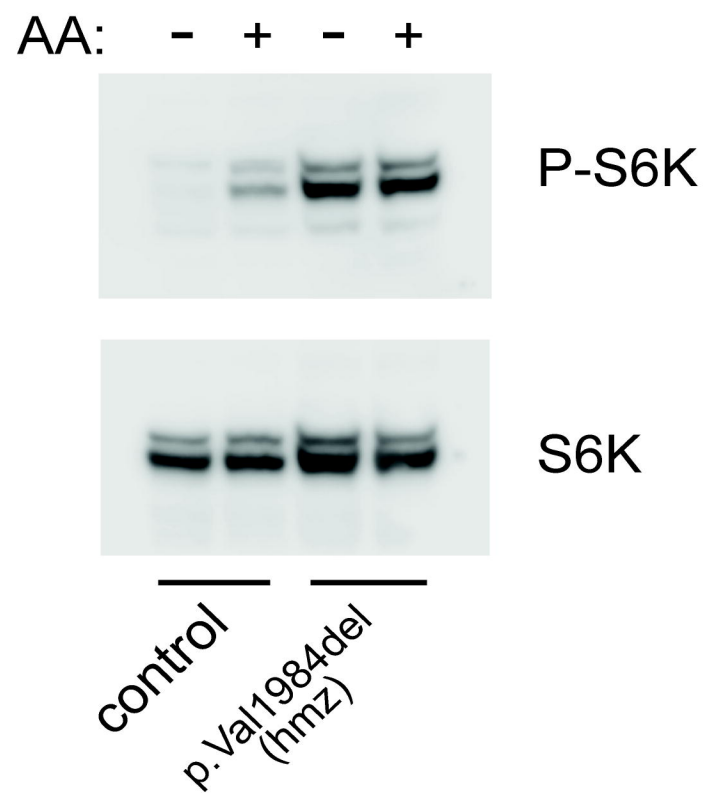**C**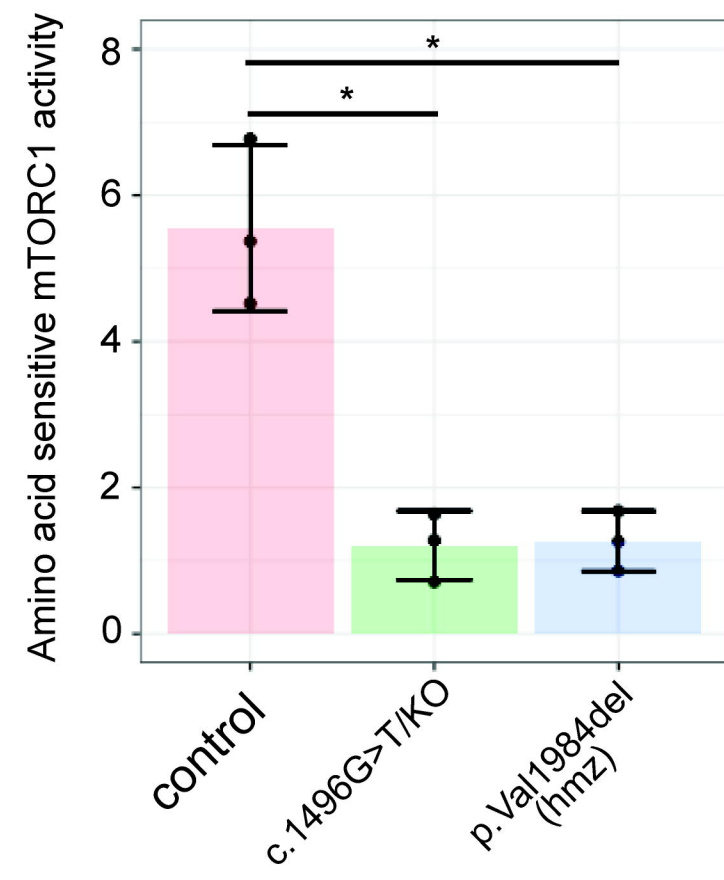

**A**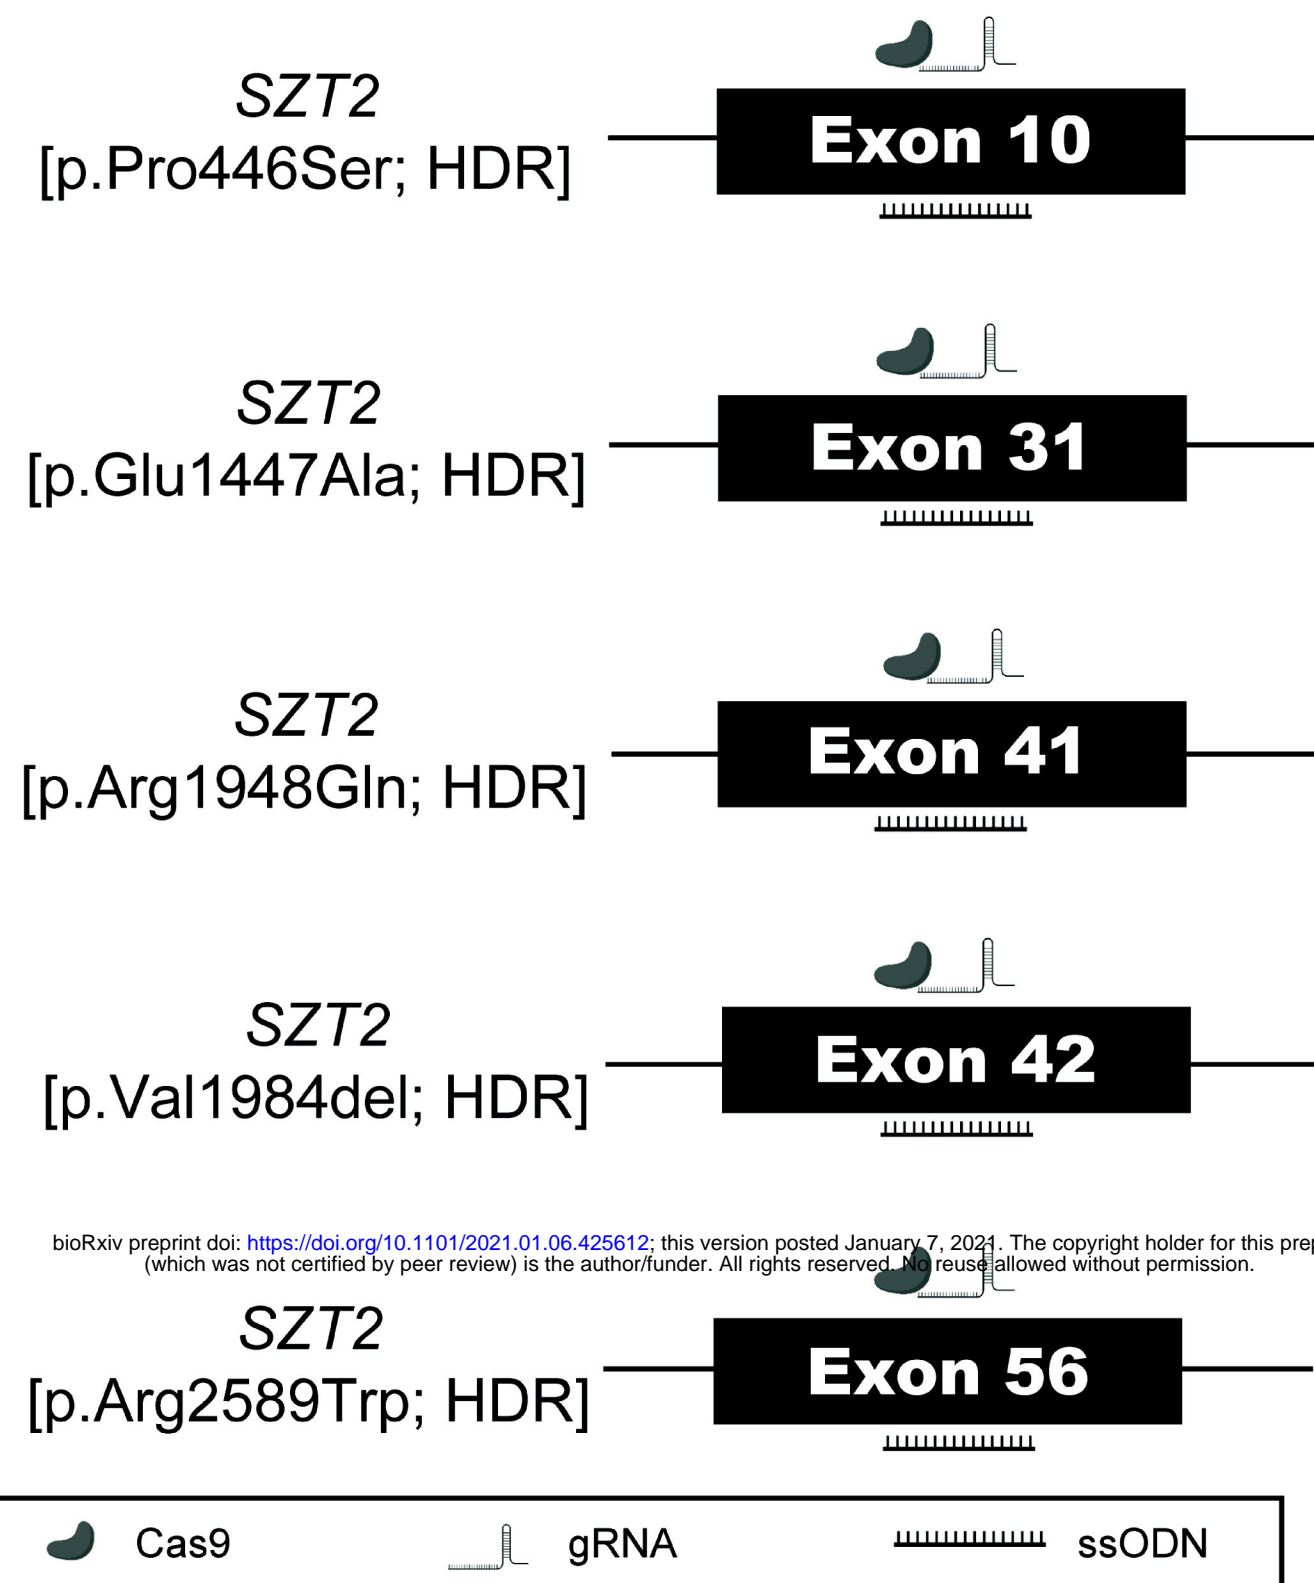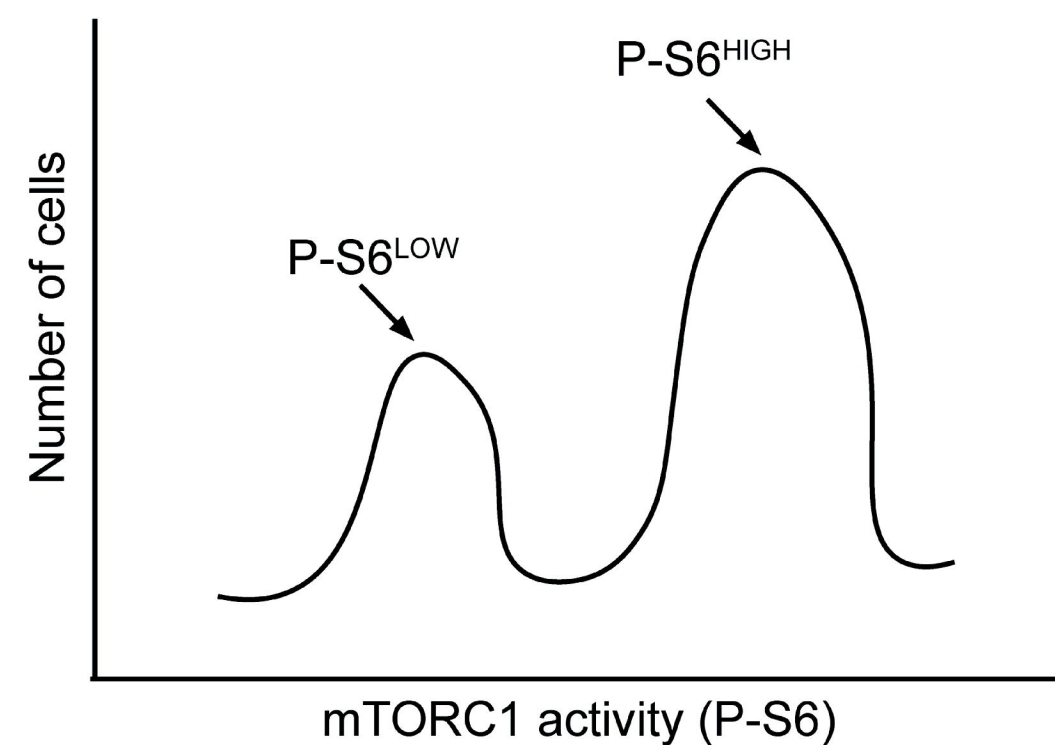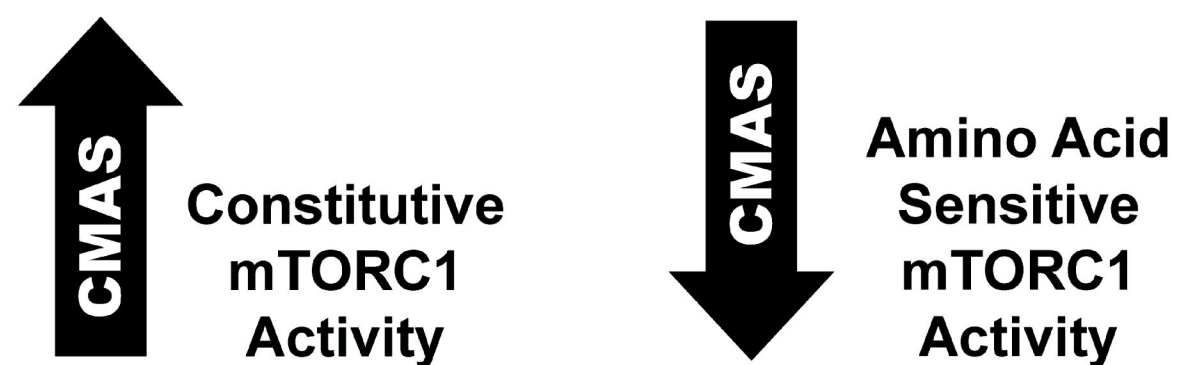**B**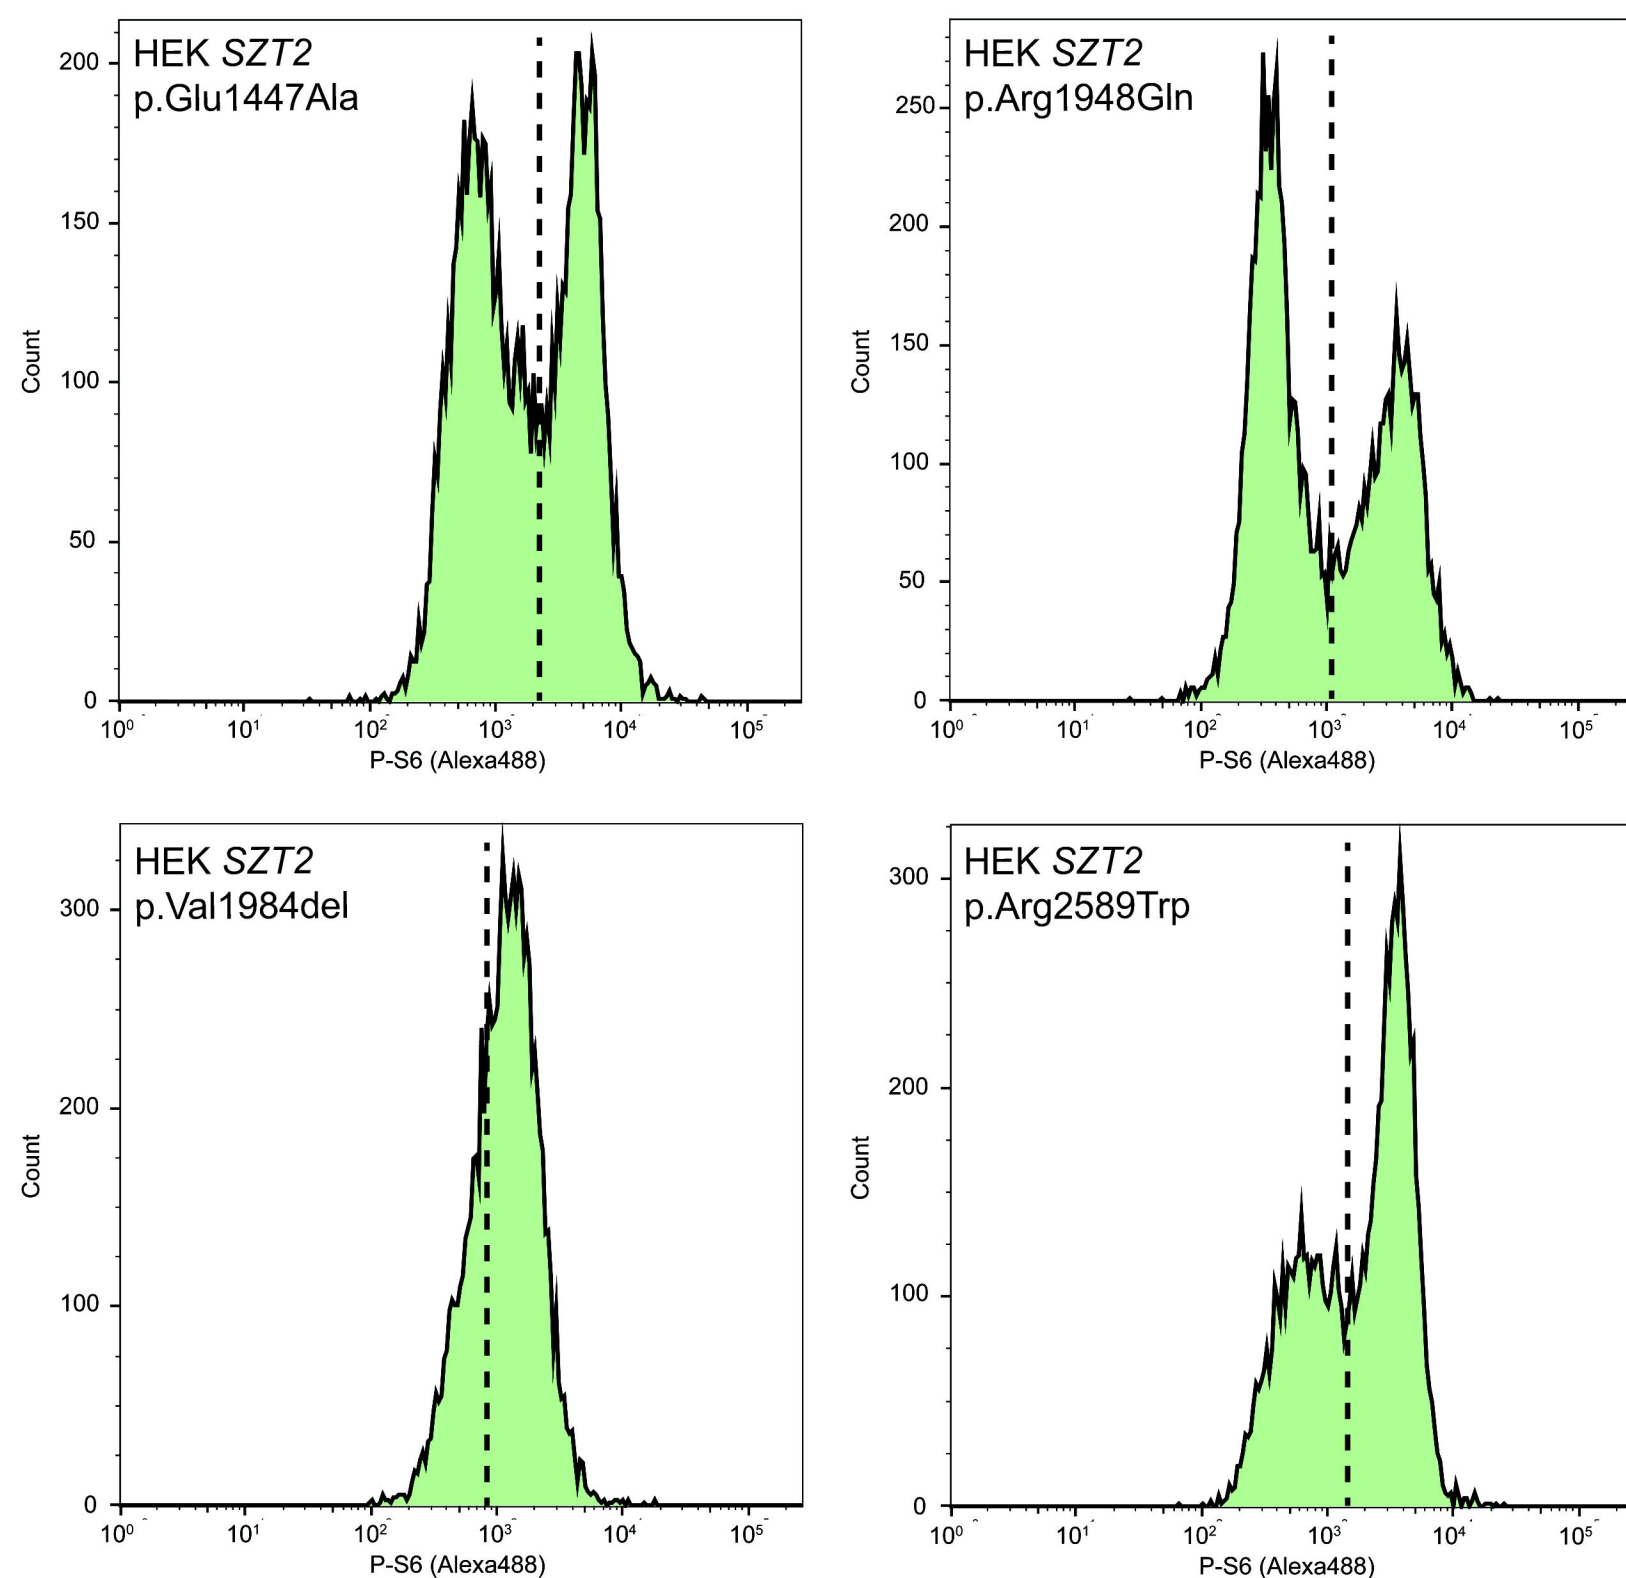**C**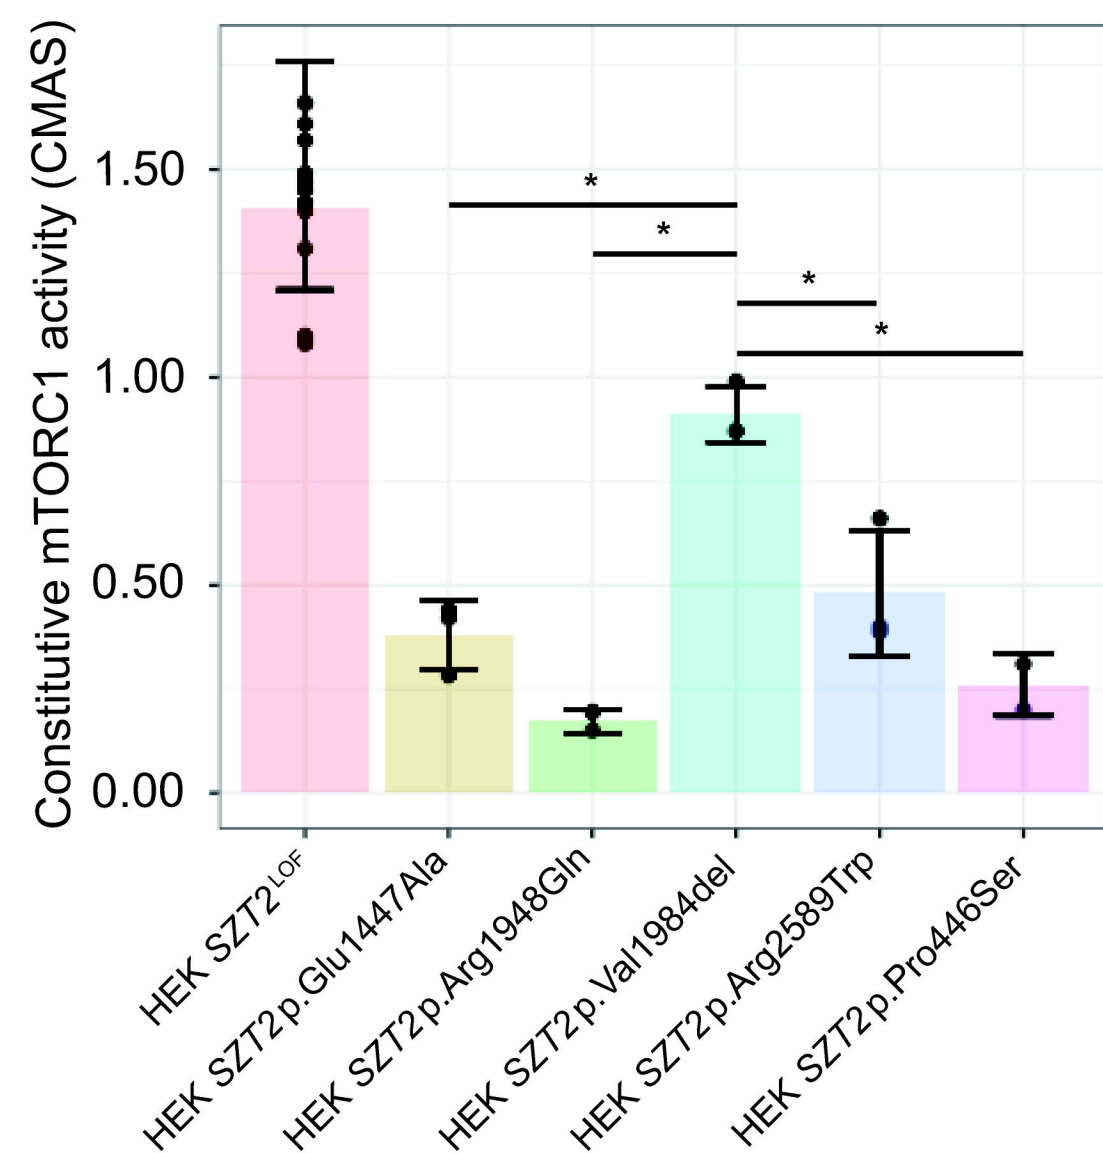

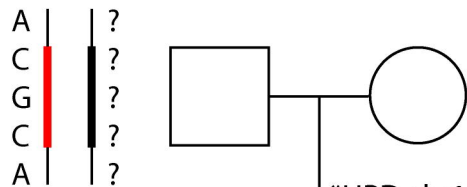

\*UPD chr1

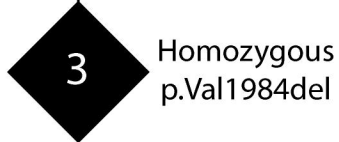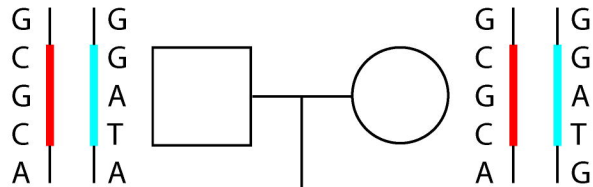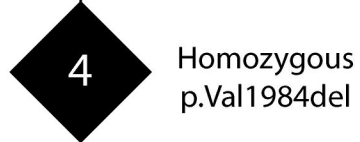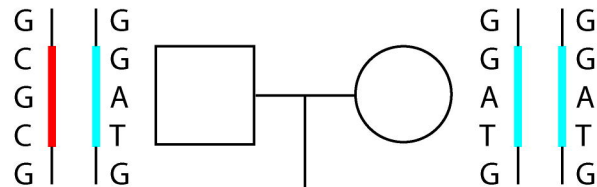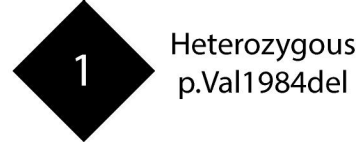

~6.7 Mb  
~4.0 Mb

rs12406524 (0.0007466)  
rs142849148 (0.009065)  
rs1126742 (0.1284)  
rs13376679 (0.2281)  
rs75538709 (0.1443)

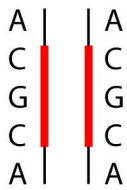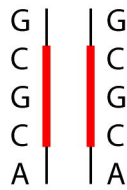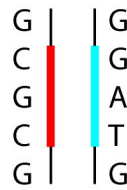

Source: https://biorxiv.org/content/10.1101/2021.01.06.425612v1.full.pdf
